# Supplementary material for: Highly Active Palladium-Decorated Reduced Graphene Oxides for Heterogeneous Catalysis and Electrocatalysis: Hydrogen Production from Formaldehyde and Electrochemical Formaldehyde Detection
Source: MDPI journal article supplement (doi:10.3390/nano12111890), 2022-05-31
Supplement: s1 [file s1]

Supporting Information

# Highly Active Palladium-Decorated Reduced Graphene Oxides for Heterogeneous Catalysis and Electrocatalysis: Hydrogen Production from Formaldehyde and Electrochemical Formaldehyde Detection

Xiaogang Liu \*, Wenjie Chen and Xin Zhang

College of Chemistry and Chemical Engineering, Xinyang Normal University, Xinyang 464000, China; chen2wen9jie5@163.com (W.C.); and zhangxin109zz@163.com (X.Z.)

\* Correspondence: lxg133298@163.com

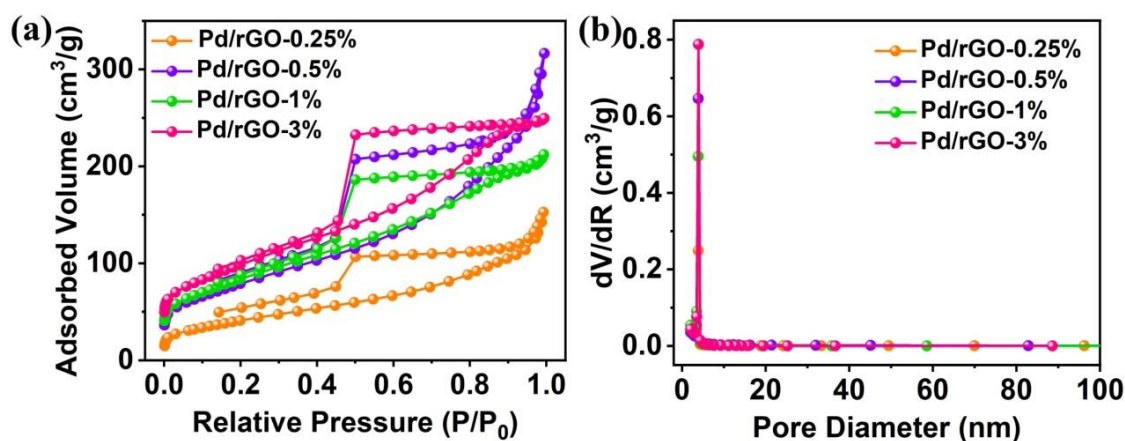

**Figure S1.** (a) N<sub>2</sub> adsorption/desorption isotherms and (b) the corresponding pore size distributions over prepared Pd/rGO-x% catalysts.

**Table S1.** Summary of the specific surface area ( $S_{\text{BET}}$ ), pore volume ( $V_{\text{p}}$ ) and average pore diameter ( $D_{\text{ap}}$ ) for Pd/rGO-x% samples.

| Samples      | $S_{\text{BET}}$ (m <sup>2</sup> g <sup>-1</sup> ) | $V_{\text{p}}$ (cm <sup>3</sup> g <sup>-1</sup> ) | $D_{\text{ap}}$ (nm) |
|--------------|----------------------------------------------------|---------------------------------------------------|----------------------|
| Pd/rGO-0.25% | 149.97                                             | 0.25                                              | 4.74                 |
| Pd/rGO-0.5%  | 286.85                                             | 0.54                                              | 5.24                 |
| Pd/rGO-1%    | 302.43                                             | 0.36                                              | 4.04                 |
| Pd/rGO-3%    | 352.97                                             | 0.43                                              | 4.25                 |

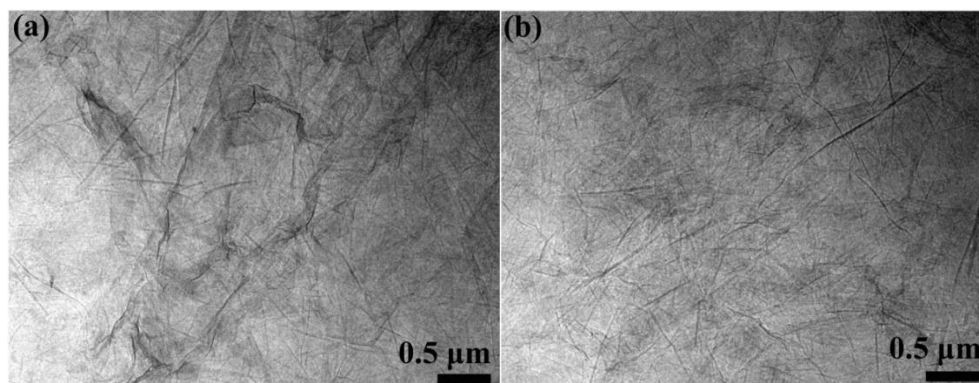

**Figure S2.** (a,b) TEM images of GO.

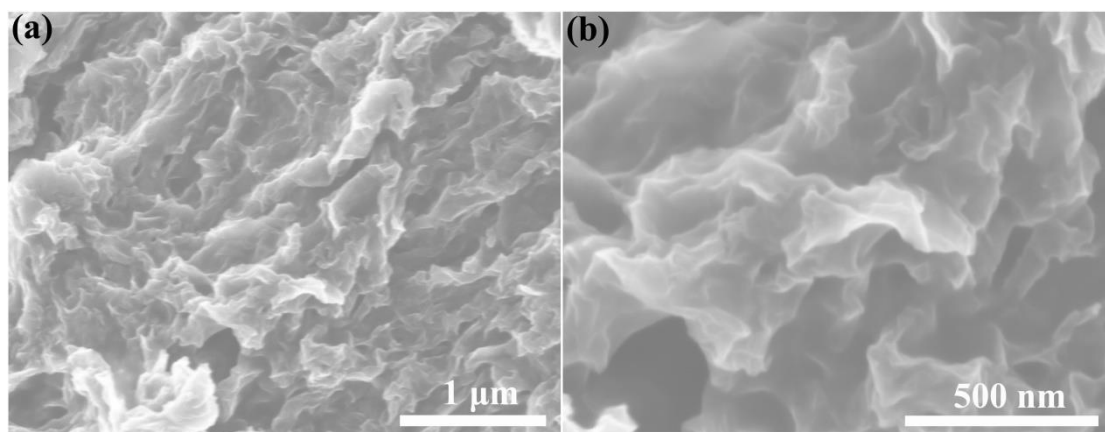

**Figure S3.** (a,b) SEM images of Pd/GO-0.25% with different magnification.

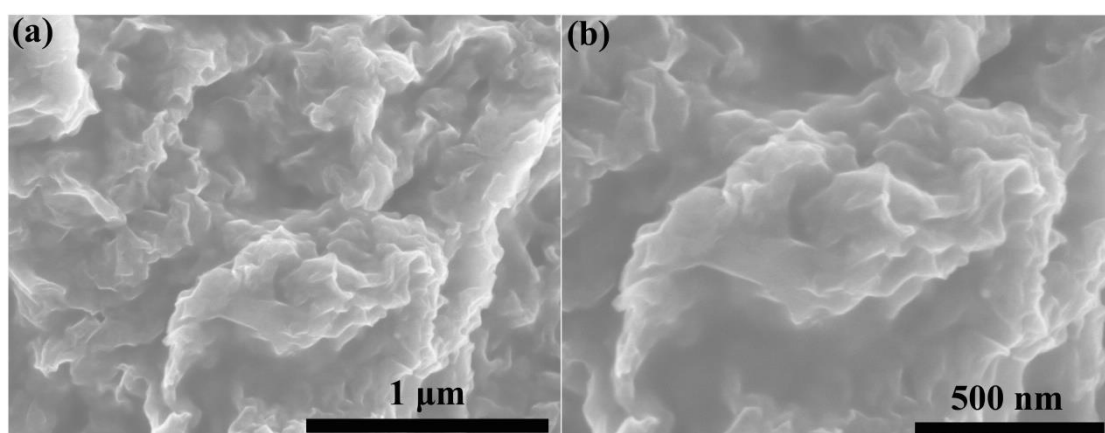

**Figure S4.** (a,b) SEM images of Pd/GO-1% with different magnification.

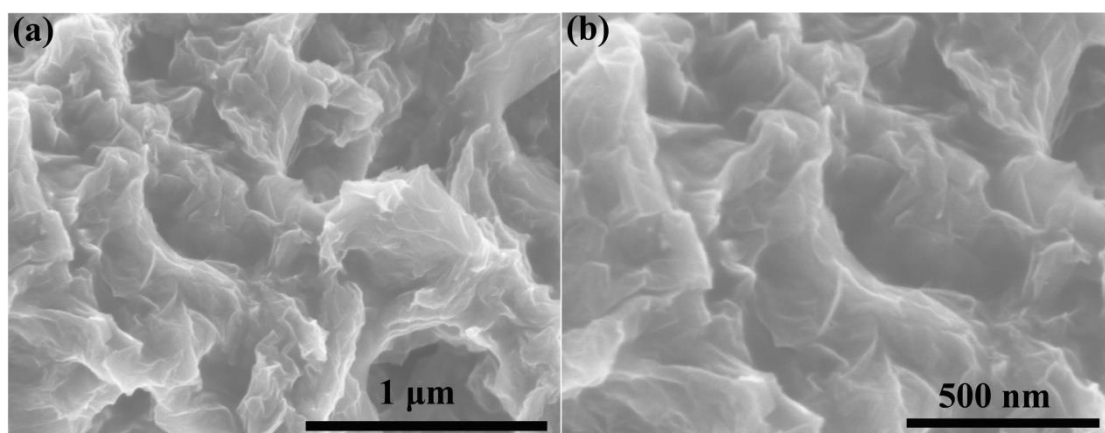

**Figure S5.** (a,b) SEM images of Pd/rGO-3% with different magnification.

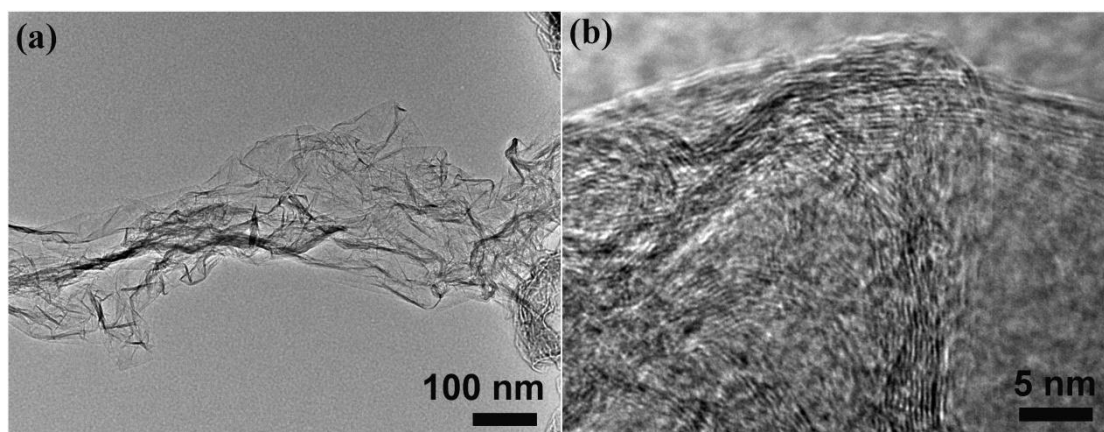

Figure S6. (a,b) TEM images of Pd/rGO-0.25% with different magnification.

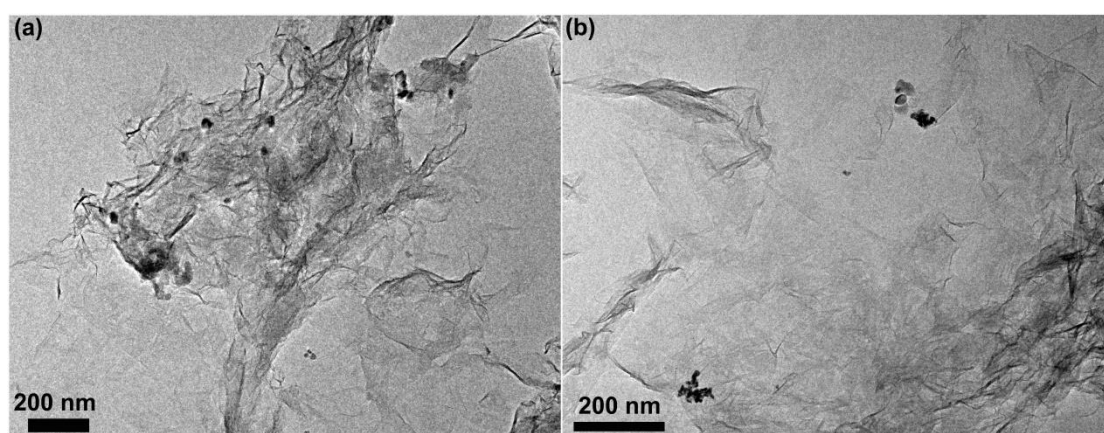

Figure S7. (a,b) TEM images of Pd/rGO-1% with different magnification.

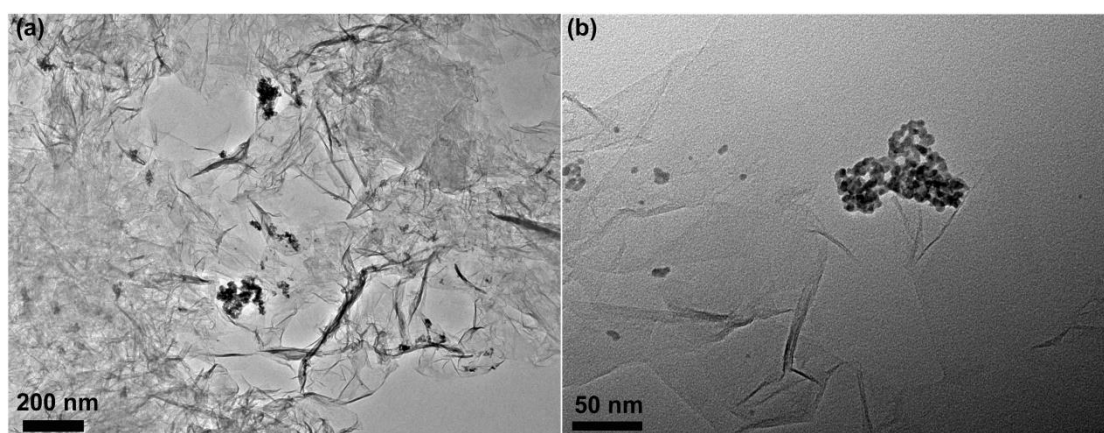

Figure S8. (a,b) TEM images of Pd/rGO-3% with different magnification.

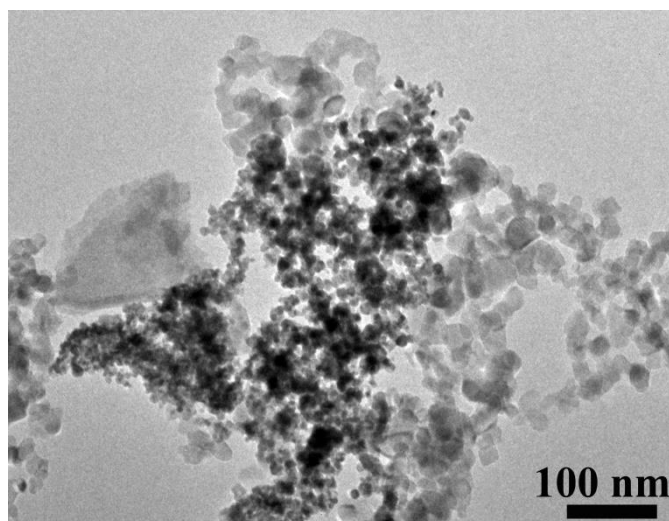

Figure S9. TEM image of prepared Pd NPs.

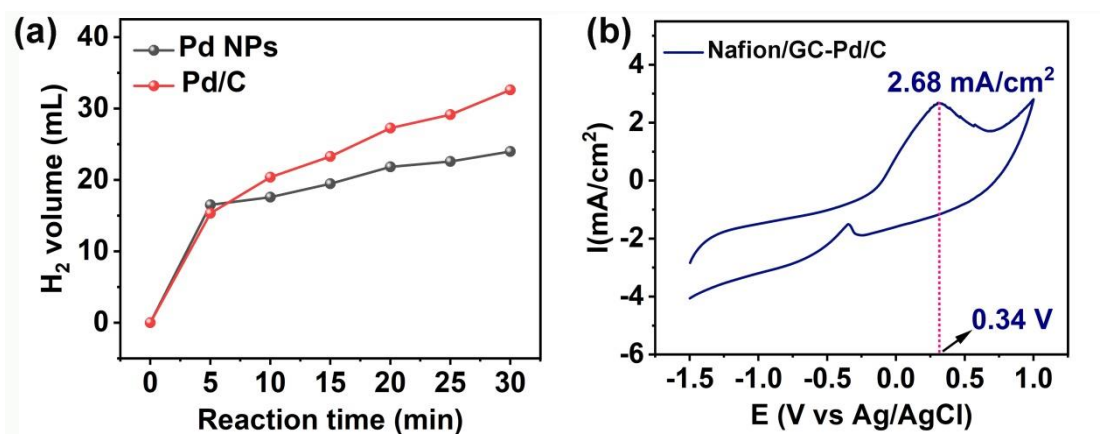

Figure S10. (a) H<sub>2</sub> production over Pd/C and Pd NPs. Reaction condition: T = 25 °C; HCHO concentration: 0.6 M; NaOH concentration: 1M; catalyst dosage: 8 mg. (b) The CV curves of the Nafion/GC-Pd/C electrode. Testing conditions: NaOH: 0.5 M; HCHO: 0.5 M; scanning rate: 100 mV/s.
